# Supplementary material for: A hydrological cycle model for the Globally Resolved Energy Balance (GREB) model v1.0
Source: Copernicus journal article supplement (doi:10.5194/gmd-12-425-2019), 2019-01-24
Supplement: Supplementary file 1 [file gmd-12-425-2019-supplement.pdf]

Supplement of Geosci. Model Dev., 12, 425–440, 2019  
<https://doi.org/10.5194/gmd-12-425-2019-supplement>  
© Author(s) 2019. This work is distributed under  
the Creative Commons Attribution 4.0 License.

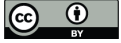

*Supplement of*

## **A hydrological cycle model for the Globally Resolved Energy Balance (GREB) model v1.0**

**C. Stassen et al.**

*Correspondence to:* Christian Stassen ([christian.stassen@monash.edu](mailto:christian.stassen@monash.edu))

The copyright of individual parts of the supplement might differ from the CC BY 4.0 License.

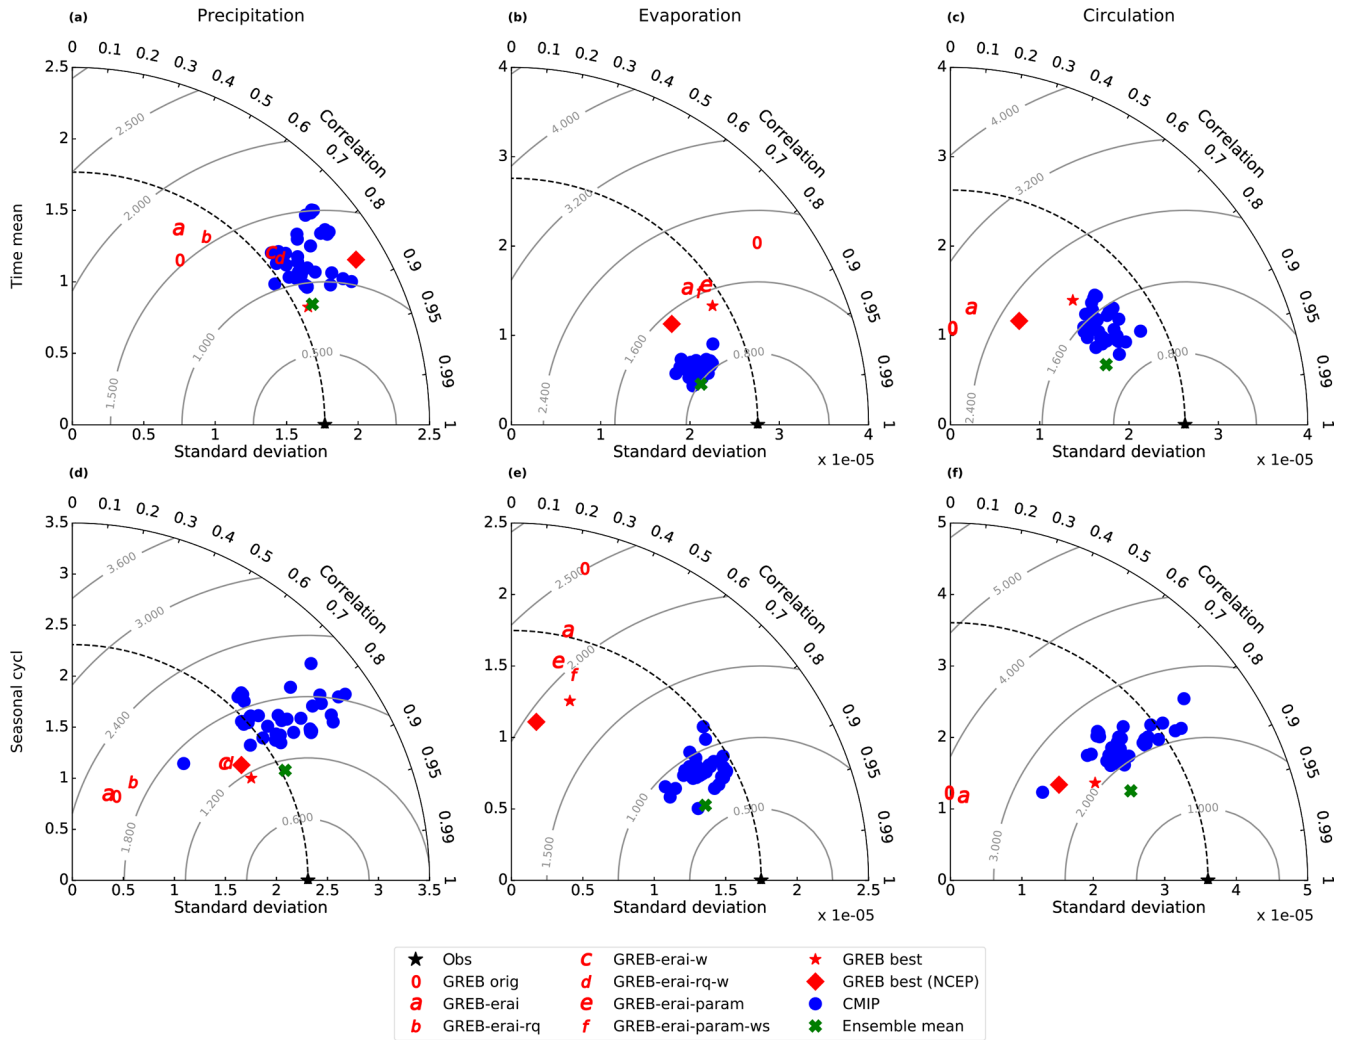

**Figure S1.** Precipitation (a, d), evaporation (b, e) and circulation (c, f) in the annual mean (a, b, c) and seasonal cycle (d, e, f) in  $\text{mm day}^{-1}$  in a Taylor diagram against observations. Red colours indicate different GREB parametrisations with 0 being the original and star (★) and diamond the best parametrisation. Star is the best model for the ERA-Interim boundary conditions and diamond uses the NCEP boundary conditions. Blue dots are CMIP5 models and the green cross indicates the ensemble mean of all CMIP5 models.
